# Supplementary material
Source: MDPI journal article supplement (https://www.mdpi.com/2624-8549/4/3/54)
Supplement: s1 [file s1]

# Supporting information

## Effective BiOCl electrons collector for enhancing photocarrier separation of Bi<sub>2</sub>WO<sub>6</sub>/BiOCl composite

Yi Zheng<sup>a</sup>, Si Qi Wang<sup>a</sup>, Min Shu<sup>a</sup>, Yi Wang<sup>a</sup>, Dumeng Cao<sup>\*b,c</sup>

Stepwise synthesis of bismuth tungstate / bismuth oxychloride with bismuth tungstate as substrate

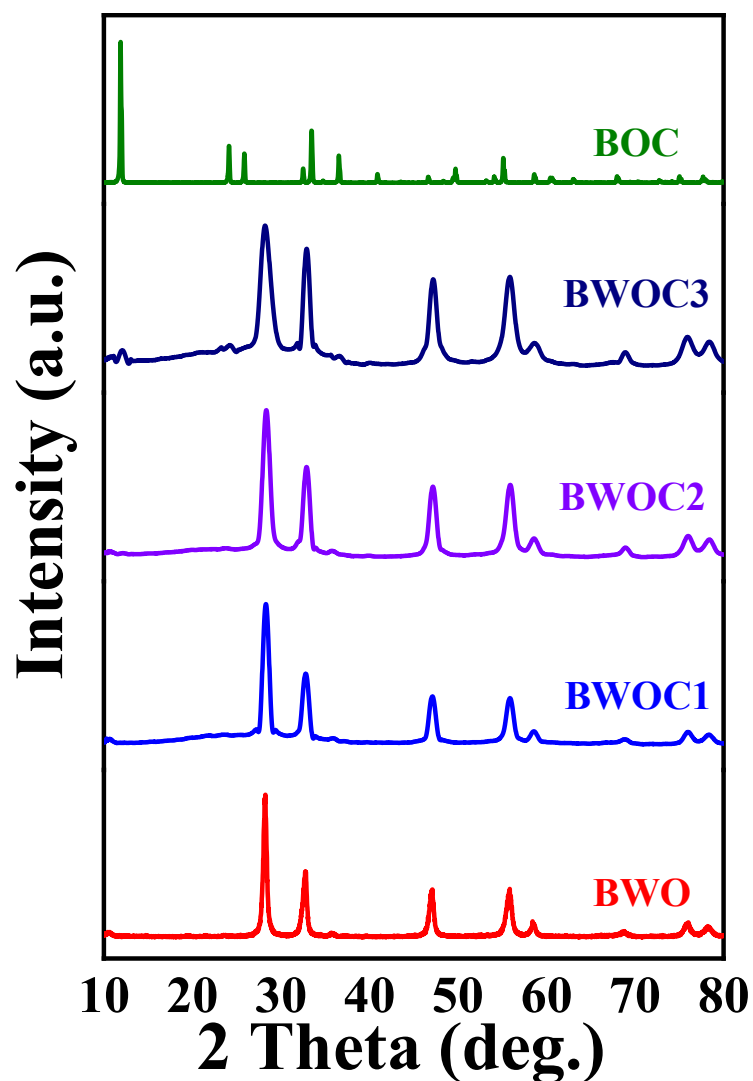

Figure S1. XRD patterns of the prepared samples: Bi<sub>2</sub>WO<sub>6</sub> (BWO), Bi<sub>2</sub>WO<sub>6</sub>/BiOCl composites (BWOC1-3) and BiOCl (BOC).

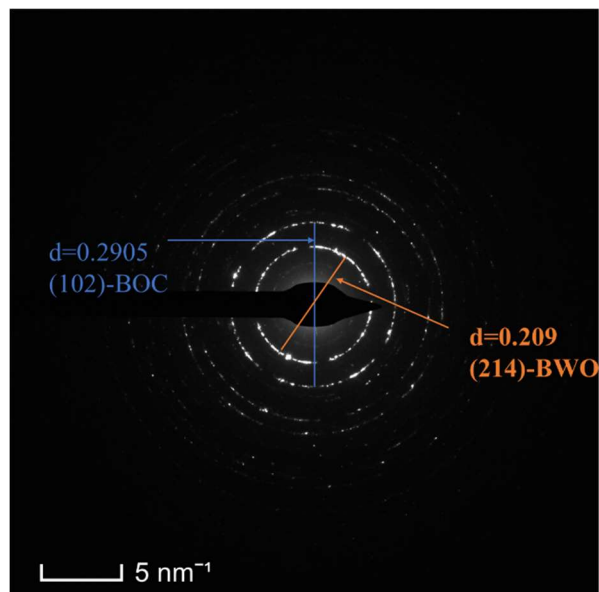

Figure S2. SADE of BWOC2 sample.

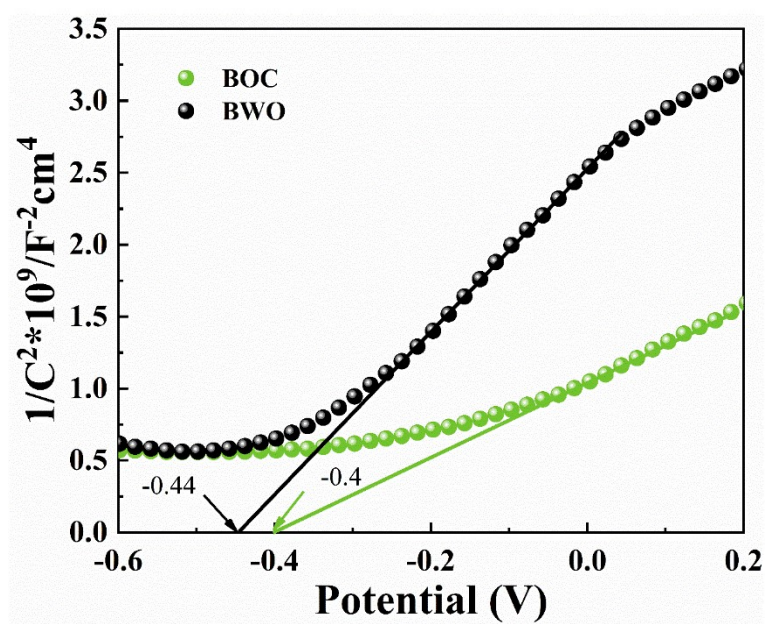

Figure S3. MS of  $\text{Bi}_2\text{WO}_6$  sample and  $\text{BiOCl}$  sample.

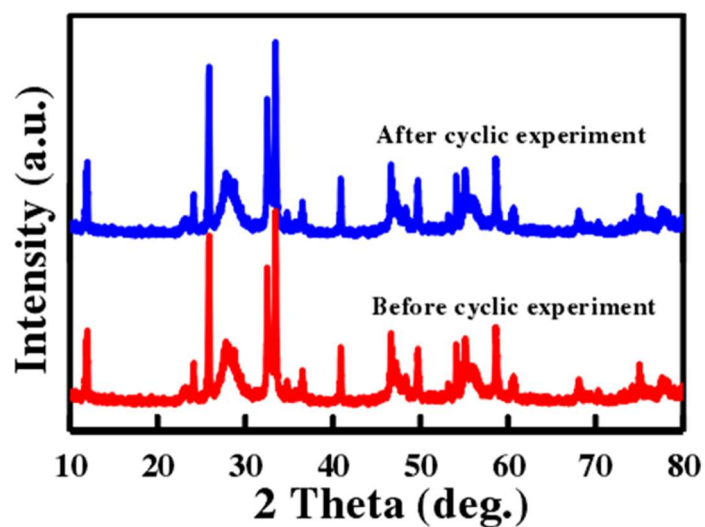

Figure S4. XRD patterns before and after cyclic experiment.

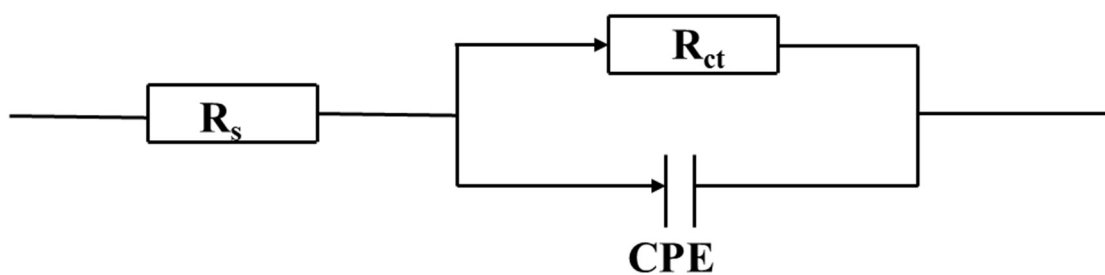

Figure S5. The equivalent circuit diagram of sample.

**Table S1.** EIS fitting data of sample.

| Sample | $R_s$ ( $\Omega/\text{cm}^2$ ) | $R_{ct}$ ( $\text{K}\Omega/\text{cm}^2$ ) | CPE ( $\text{F}/\text{cm}^2$ ) |
|--------|--------------------------------|-------------------------------------------|--------------------------------|
| BWO    | 234                            | 295                                       | $4.57 \times 10^{-5}$          |
| BWOC1  | 223                            | 245                                       | $3.57 \times 10^{-5}$          |
| BWOC2  | 197                            | 129                                       | $2.12 \times 10^{-5}$          |

|       |     |     |                       |
|-------|-----|-----|-----------------------|
| BWOC3 | 219 | 220 | $3.23 \times 10^{-5}$ |
| BOC   | 241 | 310 | $4.62 \times 10^{-5}$ |

**Table S2.** The corresponding report of Bi<sub>2</sub>WO<sub>6</sub>, BiOCl and composite photocatalysts for RhB degradation

| Photocatalysts                                                   | RhB<br>(mg/L) | Time<br>(min) | Dosage<br>(ml/mg) | Light<br>Source                      | Efficiency<br>(%) | Refs.     |
|------------------------------------------------------------------|---------------|---------------|-------------------|--------------------------------------|-------------------|-----------|
| Ag <sub>2</sub> WO <sub>4</sub> /Bi <sub>2</sub> WO <sub>6</sub> | 20            | 180           | 30/30             | UV filter 500 W<br>Xe-lamp           | 100 %             | [1]       |
| BiOBr/Bi/Bi <sub>2</sub> WO <sub>6</sub>                         | 10            | 60            | 50/50             | UV filter 350 W<br>Xe-lamp           | 98.02 %           | [2]       |
| CuS/Bi <sub>2</sub> WO <sub>6</sub>                              | 20            | 70            | 150/100           | UV filter 300 W<br>Xe-lamp           | 100 %             | [3]       |
| La-doped Bi <sub>2</sub> WO <sub>6</sub>                         | 10            | 120           | 50/130            | UV filter 300 W<br>metal halide lamp | 98.2 %            | [4]       |
| BiOBr/Bi <sub>2</sub> WO <sub>6</sub>                            | 24            | 60            | 150/150           | Xe-lamp                              | 97.5 %            | [5]       |
| Bi <sub>2</sub> WO <sub>6</sub>                                  | 10            | 100           | 50/50             | Xe-lamp                              | 70 %              | [6]       |
| BWOI2                                                            | 5             | 20            | 100/50            | 50 W LED lamp                        | 100 %             | This work |

## References

- [1] Ni Z, Shen Y, Xu L, et al. Facile construction of 3D hierarchical flower-like Ag<sub>2</sub>WO<sub>4</sub>/Bi<sub>2</sub>WO<sub>6</sub> Z-scheme heterojunction photocatalyst with enhanced visible light photocatalytic activity [J]. *Applied Surface Science*, 2022, 576(151868).
- [2] Chen X, Zhao B, Ma J, et al. The BiOBr/Bi/Bi<sub>2</sub>WO<sub>6</sub> photocatalyst with SPR effect and Z-scheme heterojunction synergistically degraded RhB under visible light [J]. *Optical Materials*, 2021, 122(111641).
- [3] Zhou H, Guo J, Fang N, et al. Investigation of photocatalytic performance of CuS/Bi<sub>2</sub>WO<sub>6</sub> and degradation pathway of RhB in water [J]. *Journal of Water Supply: Research and Technology-Aqua*, 2020, 69(2): 145-59.
- [4] Li Z, Zhu X, Liu H, et al. Synthesis of La-doped Bi<sub>2</sub>WO<sub>6</sub> to study on the removal of RhB wastewater under visible light [J]. *Journal of Nanoparticle Research*, 2021, 23(11): 1-15.
- [5] Dumrongrojthanath P, Phuruangrat A, Doungarno K, et al. Microwave-hydrothermal synthesis of BiOBr/Bi<sub>2</sub>WO<sub>6</sub> nanocomposites for enhanced photocatalytic performance [J]. *Ceramics International*, 2018, 44:S148-S51.
- [6] Lei S, Qin C, Tang X, et al. Spiral carbon fibers modified Bi<sub>2</sub>WO<sub>6</sub> with enhanced photocatalytic activity [J]. *Journal of Physics and Chemistry of Solids*, 2020, 141:109430.
